# Supplementary material for: Nucleophilic Aromatic Substitution of Pentafluorophenyl-Substituted Quinoline with a Functional Perylene: A Route to the Modification of Semiconducting Polymers
Source: MDPI journal article supplement (doi:10.3390/polym15122721), 2023-06-18
Supplement: s1 [file s1]

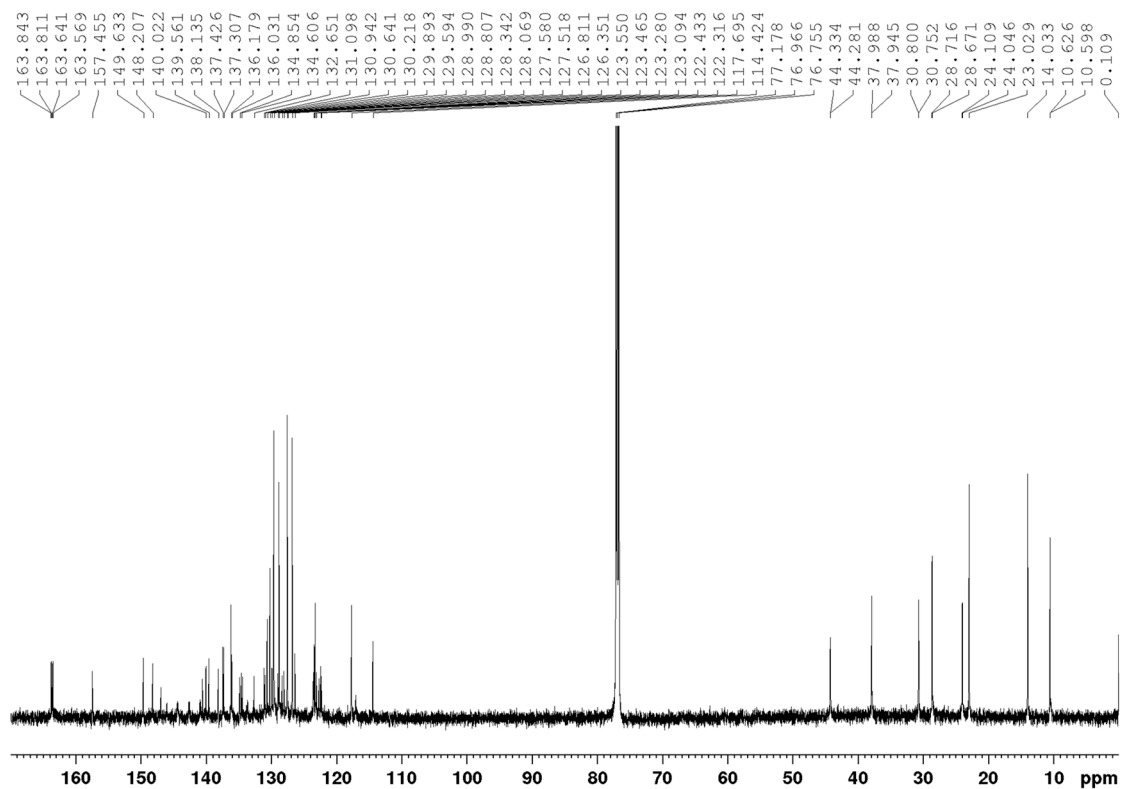

**Figure S1:**  $^{13}\text{C}$  NMR spectra of vinyl-Ph5FQPhO-diEH-PDI.

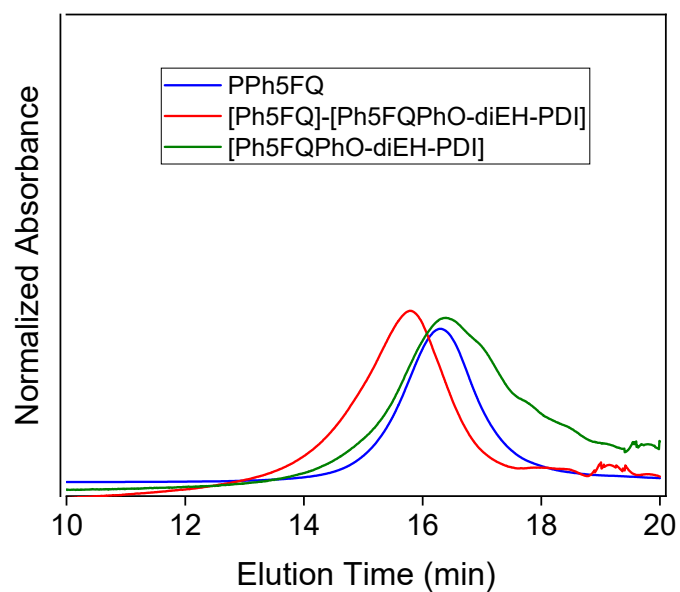

**Figure S2.** GPC traces of the precursor homopolymer PPh5FQ (black line), the [Ph5FQPhO-diEH-PDI]-[Ph5FQ] copolymer (red line) and of the [Ph5FQPhO-diEH-PDI] homopolymer (green line), using  $\text{CHCl}_3$  as eluent at a flow rate of 1 mL/min with the UV detector set at 254nm, at 25°C.

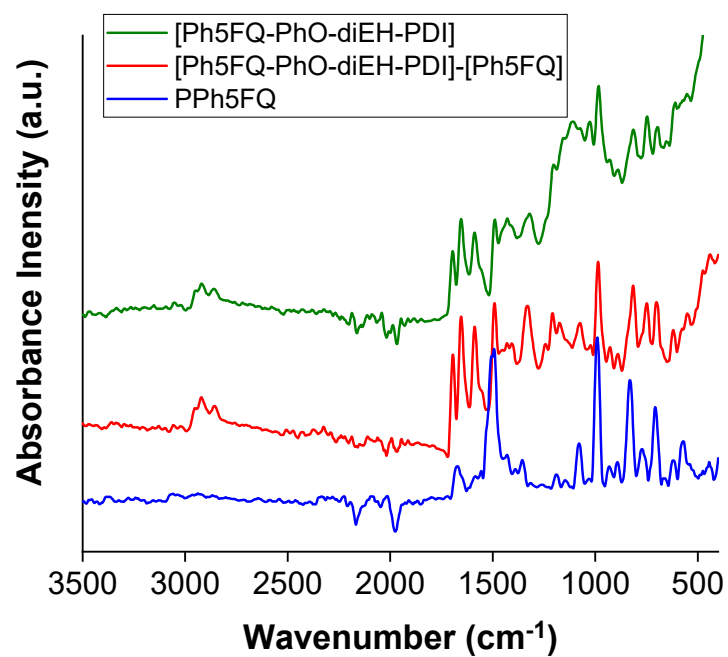

**Figure S3.** ATR spectra of the precursor homopolymer PPh5FQ, of the [Ph5FQPhO-diEH-PDI]-[Ph5FQ] copolymer and of the [Ph5FQPhO-diEH-PDI] homopolymer.
